# Supplementary material for: Maintenance Therapy With Cetuximab After FOLFIRI Plus Cetuximab for RAS Wild-Type Metastatic Colorectal Cancer: A Phase 2 Randomized Clinical Trial
Source: PubMed Central journal article supplement — JAMA Netw Open. 2023 Sep 18;6(9):e2333533. doi: 10.1001/jamanetworkopen.2023.33533 (PMC10507485; doi:10.1001/jamanetworkopen.2023.33533), 2023-09-18
Supplement: jamanetwopen-e2333533-s002.pdf [file jamanetwopen-e2333533-s002.pdf]

## Supplementary Online Content

Boige V, Blons H, François E, et al. Maintenance therapy with cetuximab after FOLFIRI plus cetuximab for *RAS* wild-type metastatic colorectal cancer: a phase 2 randomized clinical trial. *JAMA Netw Open*. 2023;6(9):e2333533.

doi:10.1001/jamanetworkopen.2023.33533

**eAppendix.** List of Recruiting Study Centers

**eFigure 1.** Study Design

**eTable 1.** Stratification Factors in Patients Randomized (ITT2 Population)

**eTable 2.** Number of FOLFIRI Plus Cetuximab Sequence Reintroductions in Patients Randomized (ITT2 Population)

**eTable 3.** Summary of Outcomes in *RAS* and *BRAF*<sup>V600</sup> Wild-Type Randomized Patients (ITT3 Population)

**eTable 5.** Summary of *TP53*, MAPK or *PIK3CA* Pathway Activating Mutations (ITT1 Population)

**eFigure 2.** Kaplan-Meier Estimates of Overall Survival From Randomization According to MAPK Pathway Activation (ITT2 Population)

**eFigure 3.** Kaplan-Meier Estimates of Progression-Free Survival From Randomization According to MAPK Pathway Activation and to Treatment Arm (ITT2 Population)

**eTable 6.** Exploratory Multivariate Analysis: Factors Significantly Associated With Progression-Free (A) and Overall Survival (B) in Patients Randomized (ITT2 Population)

**eTable 7.** Adverse Events of Interest During Induction FOLFIRI Plus Cetuximab and During First Chemotherapy-Free Interval

**eMethods.** Sequencing

This supplementary material has been provided by the authors to give readers additional information about their work.

**eAppendix.** List of Recruiting Study Centers

|                                                       |                                  |
|-------------------------------------------------------|----------------------------------|
| <b>GUSTAVE ROUSSY VILLEJUIF</b>                       | Dr Valérie BOIGE                 |
| <b>CHU DUPUYTREN LIMOGES</b>                          | Dr Valérie LEBRUN LY             |
| <b>HOPITAL ROBERT DEBRE REIMS</b>                     | Pr Olivier BOUCHE                |
| <b>CENTRE ANTOINE LACASSAGNE NICE</b>                 | Dr Eric FRANCOIS                 |
| <b>HOPITAL SAINT GREGOIRE</b>                         | Dr Laurent MIGLIANICO            |
| <b>CENTRE OSCAR LAMBRET LILLE</b>                     | Pr Nicolas PENEL                 |
| <b>INSTITUT SAINTE CATHERINE AVIGNON</b>              | Dr Laurent MINEUR                |
| <b>INSTITUT PAOLI CALMETTES MARSEILLE</b>             | Dr Emmanuel MITRY                |
| <b>HOPITAL DU BOCAGE DIJON</b>                        | Dr Jean-Louis JOUVE              |
| <b>INSTITUT BERGONIE BORDEAUX</b>                     | Dr Dominique BECHADE             |
| <b>POLYCLINIQUE FRANCHEVILLE PERIGUEUX</b>            | Dr Charles-Briac LEVACHE         |
| <b>CLINIQUE MUTUALISE DE L'ESTUAIRE SAINT NAZAIRE</b> | Dr Catherine LIGEZA POISSON      |
| <b>CHI COTE BASQUE BAYONNE</b>                        | Dr Franck AUDEMAR                |
| <b>CLINIQUE CLEMENTVILLE MONTPELLIER</b>              | Dr Stéphane JACQUOT              |
| <b>CHU D'ANGERS</b>                                   | Pr François-Xavier CAROLI-BOSC   |
| <b>CLINIQUE FRANCOIS CHENIEUX LIMOGES</b>             | Dr Dominique GENET               |
| <b>HOPITAL AVICENNE BOBIGNY</b>                       | Pr Thomas APARICIO               |
| <b>CLINIQUE TIVOLI BORDEAUX</b>                       | Dr Nathalie BONICHON             |
| <b>HOPITAL SAINT JEAN PERPIGNAN</b>                   | Dr Faiza KHEMISSA                |
| <b>CHD VENDEE LA ROCHE SUR YON</b>                    | Dr Margot LALY                   |
| <b>CHU SAINT ETIENNE SAINT PRIEST EN JAREZ</b>        | Pr Jean-Marc PHELIP              |
| <b>CENTRE PAUL STRAUSS STRASBOURG</b>                 | Dr Meher BEN ABDELGHANI          |
| <b>CENTRE FRANCOIS BACLESSE CAEN</b>                  | Dr Marie-Pierre GALAIS           |
| <b>CENTRE LEON BERARD LYON</b>                        | Dr Christelle DE LA FOUCHARDIERE |
| <b>CENTRE HOSPITALIER DE BEAUVAIS</b>                 | Dr Fayçal HOCINE                 |
| <b>CENTRE HOSPITALIER VICTOR PROVO ROUBAIX</b>        | Dr Sylvie BLOCK                  |
| <b>CENTRE HOSPITALIER JEAN ROUGIER CAHORS</b>         | Dr Nadia LEVASSEUR               |
| <b>CENTRE HOSPITALIER DE BLOIS</b>                    | Dr Dany GARGOT                   |
| <b>CENTRE HOSPITALIER D'AUXERRE</b>                   | Dr Anne-Laure VILLING            |
| <b>CHU AMIENS</b>                                     | Dr Vincent HAUTEFEUILLE          |
| <b>CENTRE HOSPITALIER INTERCOMMUNAL FREJUS</b>        | Dr Bruno VALENZA                 |
| <b>CH DE BEZIERS</b>                                  | Dr Mohamed RAMDANI               |
| <b>CENTRE HOSPITALIER ESTAING CLERMONT FERRAND</b>    | Dr Caroline PETORIN              |
| <b>POLYCLINIQUE DE L'ORMEAU TARBES</b>                | Dr Philippe AYELA                |
| <b>ICM VAL D'AURELLE MONTPELLIER</b>                  | Dr Emmanuelle SAMALIN            |

**eFigure 1. Study Design**

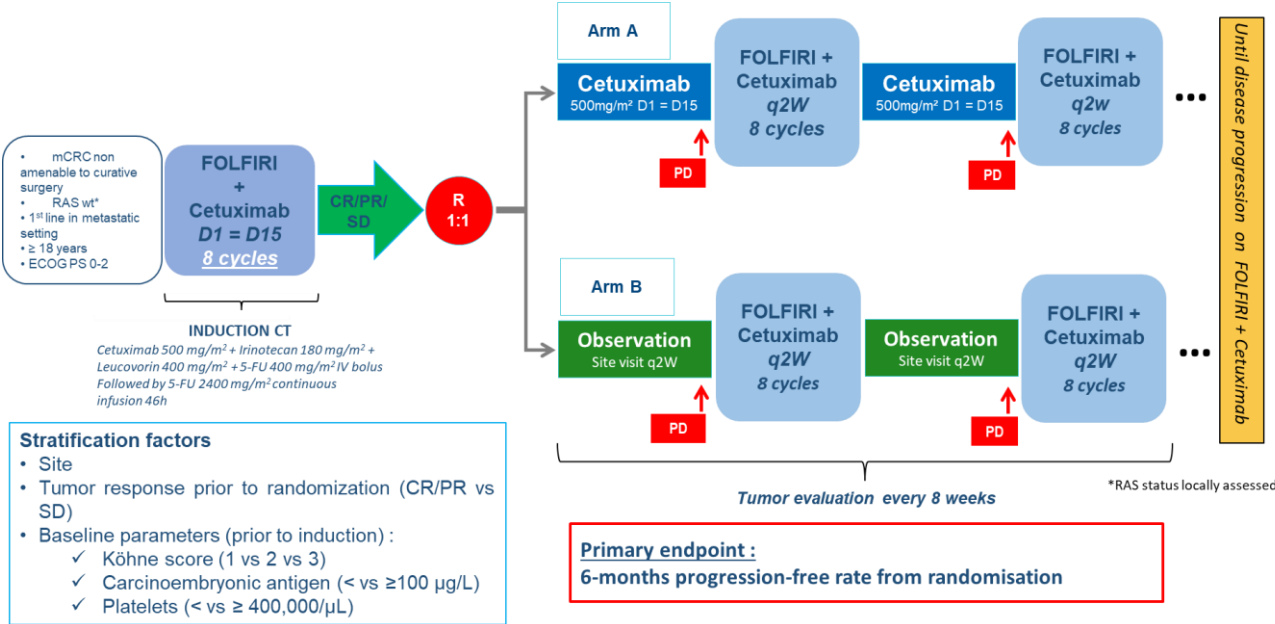

CR, complete response; ECOG, Eastern Cooperative Oncology Group; FOLFIRI, fluorouracil, folinic acid, and irinotecan; mCRC, metastatic colorectal cancer; PD, progressive disease; PFS, progression-free survival; PR, partial response; PS, performance status; q2w, biweekly; R, random assignment; SD, stable disease; wt, wild type.

**eTable 1.** Stratification Factors in Patients Randomized (ITT2 Population)

|                                         | Arm A<br>Cetuximab n=67 | Arm B<br>Observation, n=72 |
|-----------------------------------------|-------------------------|----------------------------|
| Baseline CEA ( $\mu\text{g/l}$ )        |                         |                            |
| < 100, %                                | 59.7                    | 59.7                       |
| $\geq$ 100, %                           | 40.3                    | 40.3                       |
| Baseline platelets ( $/\mu\text{l}$ ),% |                         |                            |
| < 400,000, %                            | 77.6                    | 77.8                       |
| $\geq$ 400,000, %                       | 22.4                    | 22.2                       |
| Köhne score                             |                         |                            |
| Low, %                                  | 35.8                    | 34.7                       |
| Intermediate, %                         | 46.3                    | 50.0                       |
| High, %                                 | 17.9                    | 15.3                       |

CEA, carcinoembryonic antigen

**eTable 2.** Number of FOLFIRI Plus Cetuximab Sequence Reintroductions in Patients Randomized (ITT2 Population)

|                                                                           | <b>Arm A<br/>Cetuximab maintenance (n = 67)</b> | <b>Arm B<br/>Observation (n = 72)</b> |
|---------------------------------------------------------------------------|-------------------------------------------------|---------------------------------------|
| Number of FOLFIRI-cetuximab<br>sequence reintroductions<br>Median [Range] | 1 [0-3]                                         | 1 [0-6]                               |
| 0, No. (%)                                                                | 19 (28.4)                                       | 17 (23.6)                             |
| 1, No. (%)                                                                | 34 (50.7)                                       | 29 (40.3)                             |
| 2, No. (%)                                                                | 9 (13.4)                                        | 17 (23.6)                             |
| ≥ 3, No. (%)                                                              | 5 (7.5)                                         | 9 (12.5)                              |

FOLFIRI, fluorouracil, folinic acid, and irinotecan

**eTable 3.** Summary of Outcomes in *RAS* and *BRAF*<sup>V600</sup> Wild-Type Randomized Patients (ITT3 Population)

|                                                 | Patients randomized |                                                                     |                     |                                                                      |
|-------------------------------------------------|---------------------|---------------------------------------------------------------------|---------------------|----------------------------------------------------------------------|
|                                                 | Arm A (Cetuximab)   |                                                                     | Arm B (observation) |                                                                      |
|                                                 | ITT2<br>n = 67      | ITT3<br><i>BRAF</i> <sup>V600</sup> + <i>RAS</i> WT<br>n = 60 (90%) | ITT2<br>n=72        | ITT3<br><i>BRAF</i> <sup>V600</sup> + <i>RAS</i> WT<br>n = 66 (92 %) |
| ORR during induction CT, (% evaluable patients) | 75                  | 78                                                                  | 69                  | 68                                                                   |
| 6-month PFR, % (95%CI)                          | 39 (27; 52)         | 42 (29; 55)                                                         | 6 (2; 14)           | 6 (2; 15)                                                            |
| Median PFS from randomization, months (95%CI)   | 5.3 (3.7; 7.4)      | 5.7 (3.7; 7.7)                                                      | 2.0 (1.8; 2.7)      | 2.0 (1.8; 2.8)                                                       |
| Median OS from randomization, months (95%CI)    | 24.8 (18.7; 30.4)   | 25.6 (19.4; 31.1)                                                   | 19.7 (13.3; 24.4)   | 19.7 (13.4; 24.4)                                                    |
| Median OS from inclusion, months (95%CI)        | 28.6 (22.8; 35.0)   | 29.6 (24.1; 35.1)                                                   | 24.4 (17.2; 28.6)   | 24.4 (17.2; 28.6)                                                    |
| Median TSF, months (95%CI)                      | 8.7 (7.5; 15)       | 9.4 (7.7; 15.9)                                                     | 10.1 (7.3; 10.9)    | 10.3 (7.4; 11)                                                       |

ORR, objective response rate; PFR, progression-free rate; CT, chemotherapy; PFS, progression-free survival; PR, partial response; TSF, time to strategy failure

**eTable 4.** Detailed Tumor NGS Data Available in the ITT1 Population (n=189)  
See Supplement 3

**eTable 5.** Summary of *TP53*, MAPK or *PIK3CA* Pathway Activating Mutations (ITT1 Population)

|               |                     | Patients not randomized<br>n=75 | Patients randomized |                     |              | Overall population<br>n=214 |
|---------------|---------------------|---------------------------------|---------------------|---------------------|--------------|-----------------------------|
|               |                     |                                 | Cetuximab<br>N=67   | Observation<br>N=72 | Total, n=139 |                             |
| <i>TP53</i>   | wt, No. (%)         | 27 (40.9)                       | 22 (36.1)           | 24 (38.7)           | 46 (37.4)    | 73 (38.6)                   |
|               | Mutated, No. (%)    | 39 (59.1)                       | 39 (63.9)           | 38 (61.3)           | 77 (62.6)    | 116 (61.4)                  |
|               | <i>Missing, No.</i> | 9                               | 6                   | 10                  | 16           | 25                          |
| MAPK          | wt, No. (%)         | 39 (59.1)                       | 47 (77.0)           | 49 (79.0)           | 96 (78.0)    | 135 (71.4)                  |
|               | Mutated, No. (%)    | 27 (40.9)                       | 14 (23.0)           | 13 (21.0)           | 27 (22.0)    | 54 (28.6)                   |
|               | <i>Missing, No.</i> | 9                               | 6                   | 10                  | 16           | 25                          |
| <i>PIK3CA</i> | wt, No. (%)         | 54 (81.8%)                      | 49 (80.3%)          | 50 (80.6%)          | 99 (80.5%)   | 153 (80.9%)                 |
|               | Mutated, No. (%)    | 12 (18.2%)                      | 12 (19.7%)          | 12 (19.4%)          | 24 (19.5%)   | 36 (19.1%)                  |
|               | <i>Missing, No.</i> | 9                               | 6                   | 10                  | 16           | 25                          |

MAPK, Mitogen-activated protein kinase; wt, wild-type



**eFigure 2.** Kaplan-Meier Estimates of Overall Survival From Randomization According to MAPK Pathway Activation (ITT2 Population)

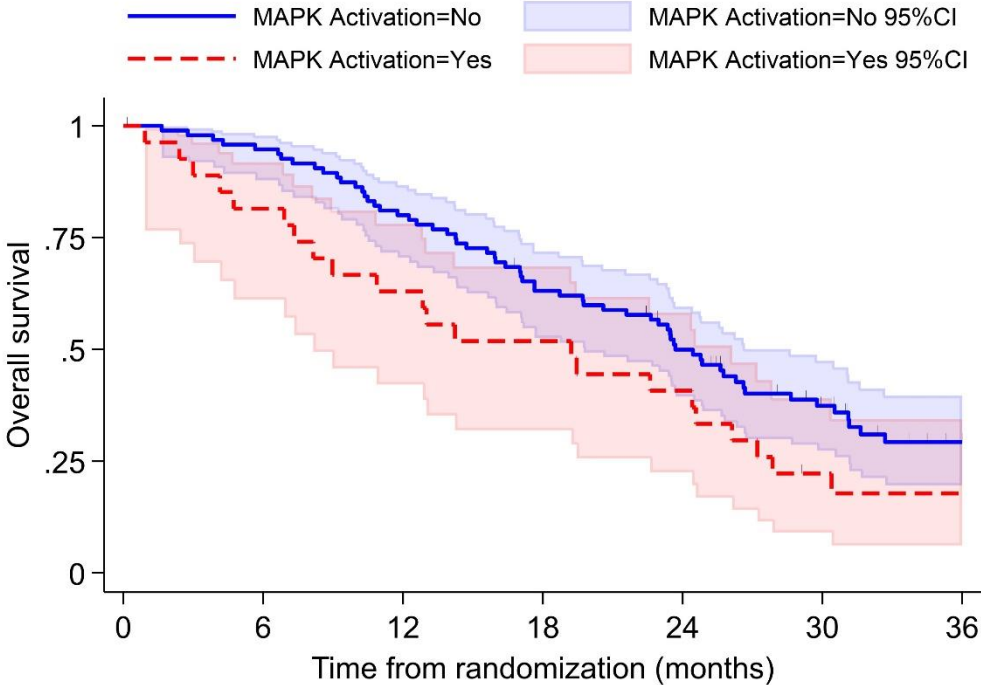

| Number at risk        |    | 0  | 6  | 12 | 18 | 24 | 30 | 36 |
|-----------------------|----|----|----|----|----|----|----|----|
| MAPK Activation - No  | 96 | 90 | 76 | 59 | 44 | 26 | 14 |    |
| MAPK Activation - Yes | 27 | 22 | 17 | 14 | 11 | 5  | 4  |    |

MAPK, Mitogen-activated protein kinase

**eFigure 3.** Kaplan-Meier Estimates of Progression-Free Survival From Randomization According to MAPK Pathway Activation and to Treatment Arm (ITT2 Population)

**MAPK pathway non activated by treatment arm**

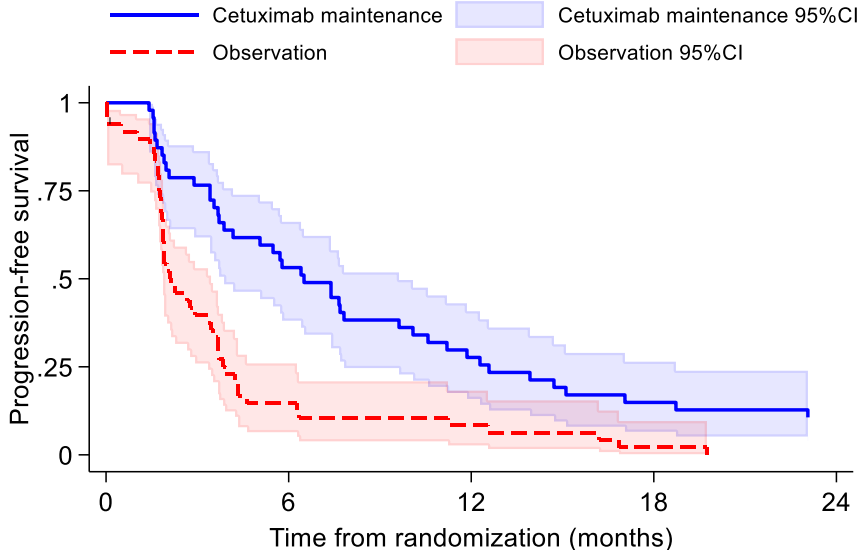

| Number at risk        |    | 0  | 6  | 12 | 18 | 24 |
|-----------------------|----|----|----|----|----|----|
| Cetuximab maintenance | 47 | 25 | 13 | 7  | 5  |    |
| Observation           | 49 | 7  | 4  | 1  | 0  |    |

**MAPK pathway activated by treatment arm**

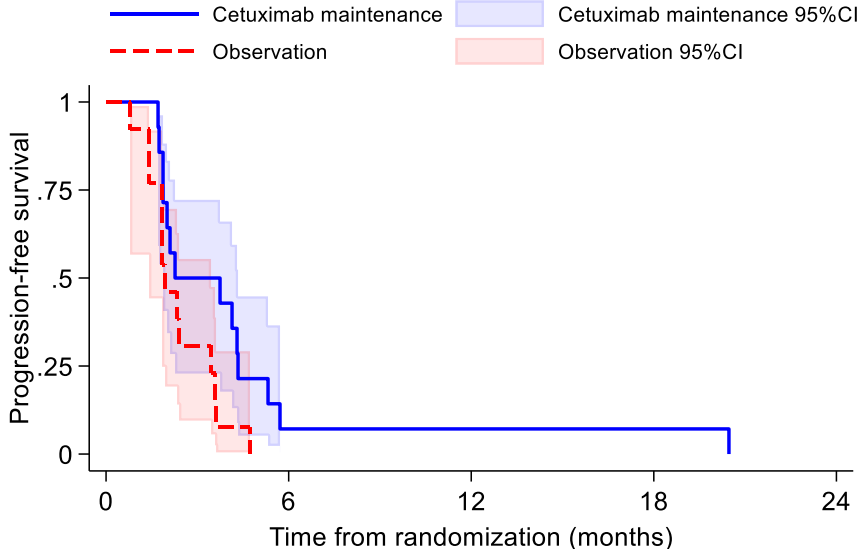

| Number at risk        |    | 0 | 6 | 12 | 18 | 24 |
|-----------------------|----|---|---|----|----|----|
| Cetuximab maintenance | 14 | 1 | 1 | 1  | 0  |    |
| Observation           | 13 | 0 | 0 | 0  | 0  |    |

### Cetuximab arm by MAPK pathway activation

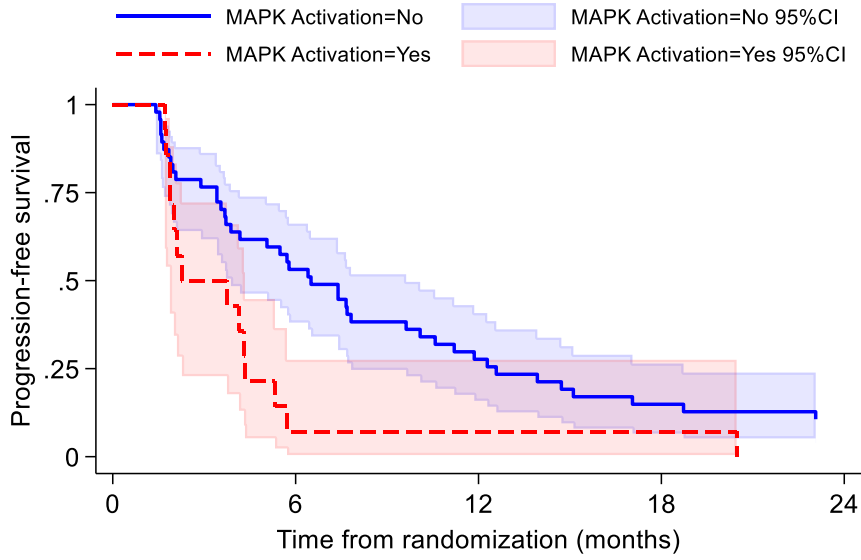

| Number at risk        |    | 0  | 6  | 12 | 18 | 24 |
|-----------------------|----|----|----|----|----|----|
| MAPK Activation - No  | 47 | 25 | 13 | 7  | 5  |    |
| MAPK Activation - Yes | 14 | 1  | 1  | 1  | 0  |    |

### Observation arm by MAPK pathway activation

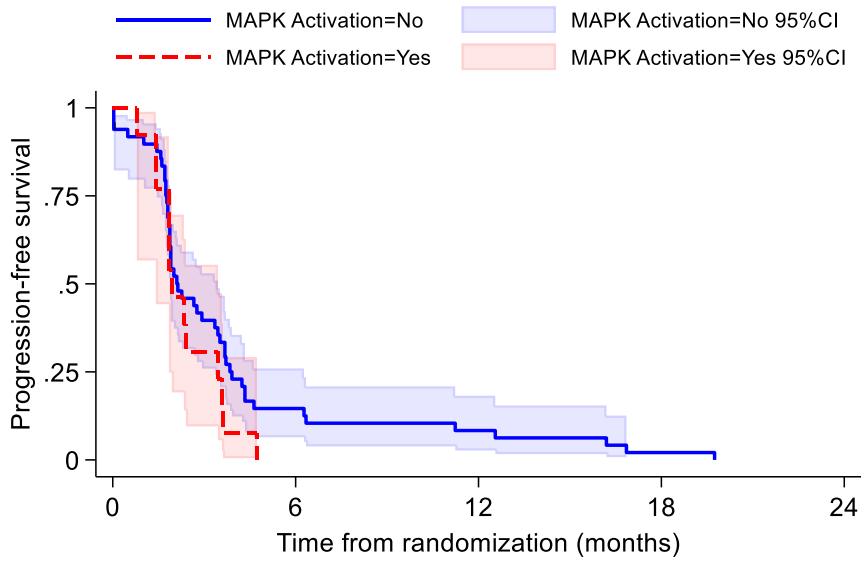

| Number at risk        |    | 0 | 6 | 12 | 18 | 24 |
|-----------------------|----|---|---|----|----|----|
| MAPK Activation - No  | 49 | 7 | 4 | 1  | 0  |    |
| MAPK Activation - Yes | 13 | 0 | 0 | 0  | 0  |    |

MAPK, Mitogen-activated protein kinase

**eTable 6.** Exploratory Multivariate Analysis: Factors Significantly Associated With Progression-Free (A) and Overall Survival (B) in Patients Randomized (ITT2 Population)

**A)**

|                                | <b>Progression-free survival<br/>N = 122, Events = 119</b> | <b>Hazard Ratio<br/>(95% CI)<sup>Cox</sup></b> | <b>p-value</b>   |
|--------------------------------|------------------------------------------------------------|------------------------------------------------|------------------|
| <b>Arm</b>                     |                                                            |                                                | <b>&lt;.0001</b> |
| Cetuximab                      |                                                            | 0.36 (0.24-0.53)                               |                  |
| Observation                    |                                                            | Reference                                      |                  |
| <b>Baseline platelet count</b> |                                                            |                                                | <b>0.0397</b>    |
| < 400 x 10 <sup>9</sup> /L     |                                                            | Reference                                      |                  |
| ≥ 400 x 10 <sup>9</sup> /L     |                                                            | 1.64 (1.03-2.63)                               |                  |
| <b>Köhne Score</b>             |                                                            |                                                | <b>0.0368</b>    |
| 1                              |                                                            | Reference                                      |                  |
| 2                              |                                                            | 1.52 (1.00-2.29)                               |                  |
| 3                              |                                                            | 0.81 (0.46-1.45)                               |                  |
| <b>Site of primary tumor</b>   |                                                            |                                                | <b>0.0014</b>    |
| Right                          |                                                            | 2.33 (1.39-3.92)                               |                  |
| Left                           |                                                            | Reference                                      |                  |
| <b>MAPK pathway activation</b> |                                                            |                                                | <b>0.0437</b>    |
| No                             |                                                            | Reference                                      |                  |
| Yes                            |                                                            | 1.63 (1.01-2.62)                               |                  |

**B)**

|                                | <b>Overall survival<br/>N=138, Events = 104</b> | <b>Hazard Ratio<br/>(95% CI)<sup>Cox</sup></b> | <b>p-value</b> |
|--------------------------------|-------------------------------------------------|------------------------------------------------|----------------|
| <b>Baseline platelet count</b> |                                                 |                                                | <b>0.0289</b>  |
| < 400 x 10 <sup>9</sup> /L     |                                                 | Reference                                      |                |
| ≥ 400 x 10 <sup>9</sup> /L     |                                                 | 1.66 (1.05-2.61)                               |                |
| <b>Site of primary tumor</b>   |                                                 |                                                | <b>0.0011</b>  |
| Right                          |                                                 | 2.13 (1.35-3.36)                               |                |
| Left                           |                                                 | Reference                                      |                |

MAPK, Mitogen-activated protein kinase

**eTable 7.** Adverse Events of Interest During Induction FOLFIRI Plus Cetuximab and During First Chemotherapy-Free Interval

|                                       | Induction FOLFIRI plus cetuximab |            | First chemotherapy free interval |            |                               |            |
|---------------------------------------|----------------------------------|------------|----------------------------------|------------|-------------------------------|------------|
|                                       | Safety set<br>N = 208            |            | Arm A (Cetuximab)<br>N = 67      |            | Arm B (Observation)<br>N = 72 |            |
|                                       | All grade                        | Grade ≥ 3  | All grade                        | Grade ≥ 3  | All grade                     | Grade ≥ 3  |
| Anemia                                | 123 (59.1%)                      | 4 (1.9%)   | 25 (37.3%)                       | 0 (0.0%)   | 22 (30.6%)                    | 0 (0.0%)   |
| Leucopenia                            | 86 (41.3%)                       | 6 (2.9%)   | 5 (7.5%)                         | 0 (0.0%)   | 3 (4.2%)                      | 0 (0.0%)   |
| Neutropenia                           | 85 (40.9%)                       | 33 (15.9%) | 7 (10.4%)                        | 1 (1.5%)   | 4 (5.6%)                      | 0 (0.0%)   |
| Febrile neutropenia                   | 9 (4.3%)                         | 9 (4.3%)   | 0 (0.0%)                         | 0 (0.0%)   | 0 (0.0%)                      | 0 (0.0%)   |
| Lymphopenia                           | 73 (35.1%)                       | 7 (3.4%)   | 15 (22.4%)                       | 0 (0.0%)   | 18 (25.0%)                    | 2 (2.8%)   |
| Pancytopenia                          | 1 (0.5%)                         | 1 (0.5%)   | 0 (0.0%)                         | 0 (0.0%)   | 0 (0.0%)                      | 0 (0.0%)   |
| Thrombocytopenia                      | 1 (0.5%)                         | 1 (0.5%)   | 0 (0.0%)                         | 0 (0.0%)   | 0 (0.0%)                      | 0 (0.0%)   |
| Conjunctivitis                        | 16 (7.7%)                        | 1 (0.5%)   | 10 (14.9%)                       | 0 (0.0%)   | 2 (2.8%)                      | 0 (0.0%)   |
| Constipation                          | 44 (21.2%)                       | 1 (0.5%)   | 8 (11.9%)                        | 0 (0.0%)   | 5 (6.9%)                      | 2 (2.8%)   |
| Diarrhea                              | 119 (57.2%)                      | 19 (9.1%)  | 22 (32.8%)                       | 4 (6.0%)   | 6 (8.3%)                      | 1 (1.4%)   |
| Abdominal pain                        | 37 (17.8%)                       | 8 (3.8%)   | 14 (20.9%)                       | 3 (4.5%)   | 12 (16.7%)                    | 5 (6.9%)   |
| Gastroenteritis                       | 1 (0.5%)                         | 1 (0.5%)   | 1 (1.5%)                         | 0 (0.0%)   | 0 (0.0%)                      | 0 (0.0%)   |
| Mucositis                             | 63 (30.3%)                       | 6 (2.9%)   | 2 (3.0%)                         | 0 (0.0%)   | 0 (0.0%)                      | 0 (0.0%)   |
| Nausea                                | 92 (44.2%)                       | 7 (3.4%)   | 13 (19.4%)                       | 1 (1.5%)   | 5 (6.9%)                      | 1 (1.4%)   |
| Pancreatitis                          | 1 (0.5%)                         | 1 (0.5%)   | 1 (1.5%)                         | 1 (1.5%)   | 0 (0.0%)                      | 0 (0.0%)   |
| Gastrointestinal obstruction          | 12 (5.8%)                        | 10 (4.8%)  | 2 (3.0%)                         | 1 (1.5%)   | 3 (4.2%)                      | 3 (4.2%)   |
| Vomiting                              | 41 (19.7%)                       | 8 (3.8%)   | 7 (10.4%)                        | 1 (1.5%)   | 2 (2.8%)                      | 0 (0.0%)   |
| General physical health/deterioration | 10 (4.8%)                        | 8 (3.8%)   | 1 (1.5%)                         | 1 (1.5%)   | 4 (5.6%)                      | 4 (5.6%)   |
| Fatigue                               | 115 (55.3%)                      | 10 (4.8%)  | 28 (41.8%)                       | 2 (3.0%)   | 18 (25.0%)                    | 2 (2.8%)   |
| Fever                                 | 20 (9.6%)                        | 2 (1.0%)   | 3 (4.5%)                         | 0 (0.0%)   | 3 (4.2%)                      | 1 (1.4%)   |
| Malaise                               | 5 (2.4%)                         | 2 (1.0%)   | 2 (3.0%)                         | 1 (1.5%)   | 0 (0.0%)                      | 0 (0.0%)   |
| Edema                                 | 13 (6.3%)                        | 1 (0.5%)   | 6 (9.0%)                         | 0 (0.0%)   | 1 (1.4%)                      | 0 (0.0%)   |
| Allergic reaction                     | 20 (9.6%)                        | 9 (4.3%)   | 0 (0.0%)                         | 0 (0.0%)   | 0 (0.0%)                      | 0 (0.0%)   |
| Infection                             | 37 (17.8%)                       | 13 (6.3%)  | 11 (16.4%)                       | 3 (4.5%)   | 4 (5.6%)                      | 2 (2.8%)   |
| ALT/AST increased                     | 88 (42.3%)                       | 2 (1.0%)   | 21 (31.3%)                       | 0 (0.0%)   | 20 (27.8%)                    | 2 (2.8%)   |
| Gama GT increased                     | 110 (52.9%)                      | 42 (20.2%) | 36 (53.7%)                       | 12 (17.9%) | 28 (38.9%)                    | 14 (19.4%) |
| Alkaline phosphatase increased        | 104 (50.0%)                      | 8 (3.8%)   | 27 (40.3%)                       | 2 (3.0%)   | 23 (31.9%)                    | 4 (5.6%)   |
| Hypophosphatemia                      | 0 (0.0%)                         | 0 (0.0%)   | 1 (1.5%)                         | 0 (0.0%)   | 1 (1.4%)                      | 1 (1.4%)   |
| Anorexia                              | 40 (19.2%)                       | 8 (3.8%)   | 5 (7.5%)                         | 2 (3.0%)   | 6 (8.3%)                      | 1 (1.4%)   |
| LDH increased                         | 27 (13.0%)                       | 0 (0.0%)   | 16 (23.9%)                       | 1 (1.5%)   | 9 (12.5%)                     | 0 (0.0%)   |
| Dehydration                           | 3 (1.4%)                         | 1 (0.5%)   | 0 (0.0%)                         | 0 (0.0%)   | 0 (0.0%)                      | 0 (0.0%)   |
| Hyperglycemia                         | 20 (9.6%)                        | 1 (0.5%)   | 8 (11.9%)                        | 2 (3.0%)   | 4 (5.6%)                      | 0 (0.0%)   |
| Hyperkalemia                          | 6 (2.9%)                         | 0 (0.0%)   | 10 (14.9%)                       | 0 (0.0%)   | 6 (8.3%)                      | 1 (1.4%)   |
| Hypoalbuminemia                       | 25 (12.0%)                       | 3 (1.4%)   | 5 (7.5%)                         | 0 (0.0%)   | 3 (4.2%)                      | 0 (0.0%)   |
| Hypocalcemia                          | 52 (25.0%)                       | 1 (0.5%)   | 9 (13.4%)                        | 0 (0.0%)   | 4 (5.6%)                      | 0 (0.0%)   |
| Hypokalemia                           | 28 (13.5%)                       | 5 (2.4%)   | 5 (7.5%)                         | 0 (0.0%)   | 1 (1.4%)                      | 0 (0.0%)   |
| Hypomagnesemia                        | 70 (33.7%)                       | 1 (0.5%)   | 31 (46.3%)                       | 3 (4.5%)   | 7 (9.7%)                      | 0 (0.0%)   |
| Hypophosphoremia                      | 4 (1.9%)                         | 1 (0.5%)   | 0 (0.0%)                         | 0 (0.0%)   | 1 (1.4%)                      | 0 (0.0%)   |

|                                 | Induction FOLFIRI plus cetuximab |           | First chemotherapy free interval |           |                               |           |  |  |
|---------------------------------|----------------------------------|-----------|----------------------------------|-----------|-------------------------------|-----------|--|--|
|                                 | Safety set<br>N = 208            |           | Arm A (Cetuximab)<br>N = 67      |           | Arm B (Observation)<br>N = 72 |           |  |  |
|                                 | All grade                        | Grade ≥ 3 | All grade                        | Grade ≥ 3 | All grade                     | Grade ≥ 3 |  |  |
| Malnutrition                    | 1 (0.5%)                         | 0 (0.0%)  | 0 (0.0%)                         | 0 (0.0%)  | 1 (1.4%)                      | 1 (1.4%)  |  |  |
| Intercranial hypertension       | 1 (0.5%)                         | 1 (0.5%)  | 0 (0.0%)                         | 0 (0.0%)  | 0 (0.0%)                      | 0 (0.0%)  |  |  |
| Renal and urinary disorders     | 16 (7.7%)                        | 2 (1.0%)  | 5 (7.5%)                         | 0 (0.0%)  | 3 (4.2%)                      | 1 (1.4%)  |  |  |
| Dyspnea                         | 8 (3.8%)                         | 3 (1.4%)  | 8 (11.9%)                        | 0 (0.0%)  | 2 (2.8%)                      | 1 (1.4%)  |  |  |
| Rash/Erythema                   | 123 (59.1%)                      | 9 (4.3%)  | 50 (74.6%)                       | 8 (11.9%) | 3 (4.2%)                      | 0 (0.0%)  |  |  |
| Alopecia                        | 38 (18.3%)                       | 0 (0.0%)  | 7 (10.4%)                        | 0 (0.0%)  | 3 (4.2%)                      | 0 (0.0%)  |  |  |
| Nail damage                     | 27 (13.0%)                       | 1 (0.5%)  | 18 (26.9%)                       | 0 (0.0%)  | 3 (4.2%)                      | 0 (0.0%)  |  |  |
| Erythroderma                    | 17 (8.2%)                        | 2 (1.0%)  | 10 (14.9%)                       | 0 (0.0%)  | 1 (1.4%)                      | 0 (0.0%)  |  |  |
| Palmoplantar erythrodysesthesia | 31 (14.9%)                       | 1 (0.5%)  | 13 (19.4%)                       | 1 (1.5%)  | 0 (0.0%)                      | 0 (0.0%)  |  |  |
| Skin crack                      | 39 (18.8%)                       | 0 (0.0%)  | 21 (31.3%)                       | 0 (0.0%)  | 3 (4.2%)                      | 0 (0.0%)  |  |  |
| Mycosis                         | 5 (2.4%)                         | 1 (0.5%)  | 1 (1.5%)                         | 0 (0.0%)  | 0 (0.0%)                      | 0 (0.0%)  |  |  |
| Pruritus                        | 25 (12.0%)                       | 1 (0.5%)  | 8 (11.9%)                        | 0 (0.0%)  | 1 (1.4%)                      | 0 (0.0%)  |  |  |
| Dry skin                        | 75 (36.1%)                       | 0 (0.0%)  | 21 (31.3%)                       | 0 (0.0%)  | 5 (6.9%)                      | 0 (0.0%)  |  |  |
| Thromboembolic event            | 24 (11.5%)                       | 11 (5.3%) | 2 (3.0%)                         | 1 (1.5%)  | 1 (1.4%)                      | 1 (1.4%)  |  |  |
| Hypertension                    | 11 (5.3%)                        | 1 (0.5%)  | 2 (3.0%)                         | 0 (0.0%)  | 2 (2.8%)                      | 0 (0.0%)  |  |  |
| Cardiac disorder                | 8 (3.8%)                         | 3 (1.4%)  | 3 (4.5%)                         | 0 (0.0%)  | 2 (2.8%)                      | 0 (0.0%)  |  |  |

**eMethods.** Sequencing

Samples were characterized for molecular alterations by targeted NGS (Ion AmpliSeq™ Colon-Lung Cancer Research Panel v2, Life Technologies™). Briefly the multiplex barcoded libraries are generated from 30-10ng of DNA following manufacturer's recommendations (Ion ampliseq library kit V2) and are normalized using the Ion Library Equalizer™ Kit. The pooled libraries (max 96) are processed on Ion Chef™ System for template preparation and chip loading (Ion PI HI-Q Chef Kit, Ion PI Chip V3), and sequenced on the Ion Proton™ System (Life Technologies™). The FASTQs sequencing data are aligned to the human genome (hg19) and processed using IonTorrent Suite. This package included the Torrent Variant Caller using the built-in "Somatic - low stringency" with optimized parameters to automatically call variants with allelic ratio >2%. Minimal depth used was 300X.
