# Supplementary material for: Maintenance Therapy With Cetuximab After FOLFIRI Plus Cetuximab for RAS Wild-Type Metastatic Colorectal Cancer: A Phase 2 Randomized Clinical Trial
Source: PubMed Central journal article supplement — JAMA Netw Open. 2023 Sep 18;6(9):e2333533. doi: 10.1001/jamanetworkopen.2023.33533 (PMC10507485; doi:10.1001/jamanetworkopen.2023.33533), 2023-09-18
Supplement: jamanetwopen-e2333533-s004.pdf [file jamanetwopen-e2333533-s004.pdf]

## Data Sharing Statement

Boige. Maintenance Therapy With Cetuximab After FOLFIRI Plus Cetuximab for RAS Wild-Type Metastatic Colorectal Cancer. *JAMA Netw Open*. Published September 18, 2023. doi:10.1001/jamanetworkopen.2023.33533

### Data

**Data available:** No
